# Supplementary material for: Developing a targeting system for bacterial membranes: measuring receptor-phosphatidylglycerol interactions with1H NMR, ITC and fluorescence correlation spectroscopy
Source: Royal Society of Chemistry journal article supplement (doi:10.1039/c4ob01895h), 2014-10-30
Supplement: c4ob01895h1.pdf [file c4ob01895h1.pdf]

## SI for “Developing a Targeting System for Bacterial Membranes: Measuring Receptor-Phosphatidylglycerol Interactions with $^1\text{H}$ NMR, ITC, and Fluorescence Correlation Spectroscopy

Amanda Alliband, Zifan Wang, Christopher Thacker, D. Paul Rillema, Doug S. English\* and Dennis H. Burns\*  
Department of Chemistry, Wichita State University, Wichita,  
Kansas 67260  
[dennis.burns@wichita.edu](mailto:dennis.burns@wichita.edu)

|                                                                                                        |          |
|--------------------------------------------------------------------------------------------------------|----------|
| S-Index .....                                                                                          | Pages S1 |
| S-Figure 1: $^1\text{H}$ NMR of <b>3</b> .....                                                         | Page S2  |
| S-Figure 2: $^{13}\text{C}$ NMR of <b>3</b> .....                                                      | Page S3  |
| S-Figure 3: HRMS of <b>3</b> .....                                                                     | Page S4  |
| S-Figure 4: $^1\text{H}$ NMR of <b>4a</b> .....                                                        | Page S5  |
| S-Figure 5: $^{13}\text{C}$ NMR of <b>4a</b> .....                                                     | Page S6  |
| S-Figure 6: $^{19}\text{F}$ NMR of <b>4a</b> .....                                                     | Page S7  |
| S-Figure 7: HRMS of <b>4a</b> .....                                                                    | Page S8  |
| S-Figure 8: $^1\text{H}$ NMR of <b>4b</b> .....                                                        | Page S9  |
| S-Figure 9: $^{13}\text{C}$ NMR of <b>4b</b> .....                                                     | Page S10 |
| S-Figure 10: $^{19}\text{F}$ NMR of <b>4b</b> .....                                                    | Page S11 |
| S-Figure 11: $^{31}\text{P}$ NMR of <b>4b</b> .....                                                    | Page S12 |
| S-Figure 12: $^{31}\text{P}$ NMR of $\text{NH}_4\text{PF}_6$ .....                                     | Page S12 |
| S-Figure 13: ESI HRMS of <b>4b</b> .....                                                               | Page S13 |
| S-Figure 14: Stacked $^1\text{H}$ NMR plot of <b>4b</b> titrated with TBAPG.....                       | Page S14 |
| S-Figure 15: Stacked $^1\text{H}$ NMR plot of <b>4b</b> titrated with TBAPG.....                       | Page S15 |
| S-Figure 16: Stacked $^1\text{H}$ NMR plot of <b>4b</b> titrated with $\text{TBAH}_2\text{PO}_4$ ..... | Page S16 |
| S-Figure 17: Stacked $^1\text{H}$ NMR plot of <b>4b</b> titrated with $\text{TBAH}_2\text{PO}_4$ ..... | Page S17 |
| S-Figure 18: $^1\text{H}$ NMR of <b>4b</b> + $\text{CD}_3\text{OD}$ .....                              | Page S18 |
| S-Figure 19: Stacked $^1\text{H}$ NMR plot of TBAPG titrated with <b>4b</b> .....                      | Page S19 |
| S-Figure 20: Job plot and $^1\text{H}$ NMR binding isotherm of <b>4b</b> + TBAPG.....                  | Page S20 |
| S-Figure 21: ITC binding isotherm of <b>4b</b> + TBAPG .....                                           | Page S21 |
| S-Figure 22: Bacteria experiment 2 and 4 hr .....                                                      | Page S22 |
| S-Figure 23: Absorption and emission spectrum of <b>4a</b> .....                                       | Page S23 |

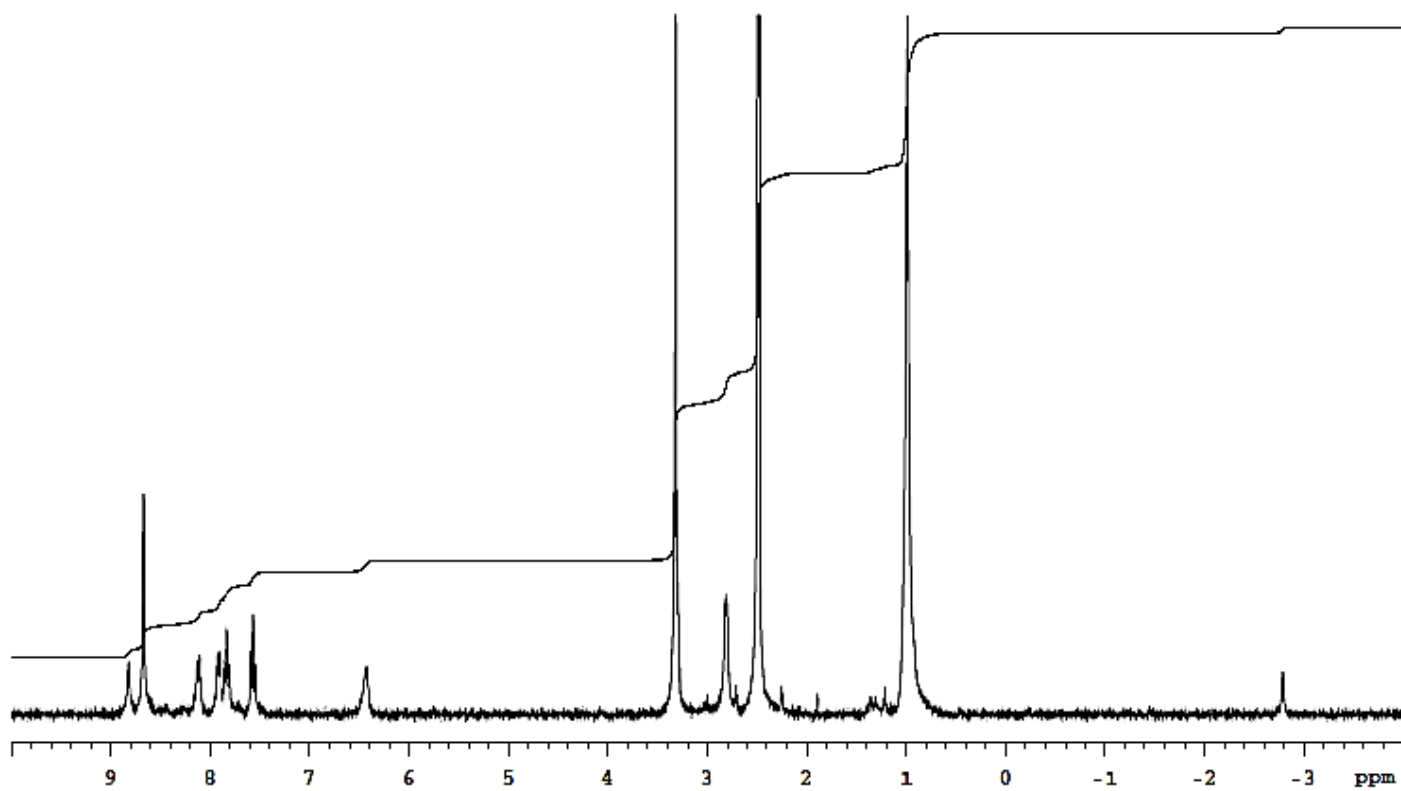

**S-Figure 1:**  $^1\text{H}$  NMR of **3** in  $\text{DMSO-d}_6$

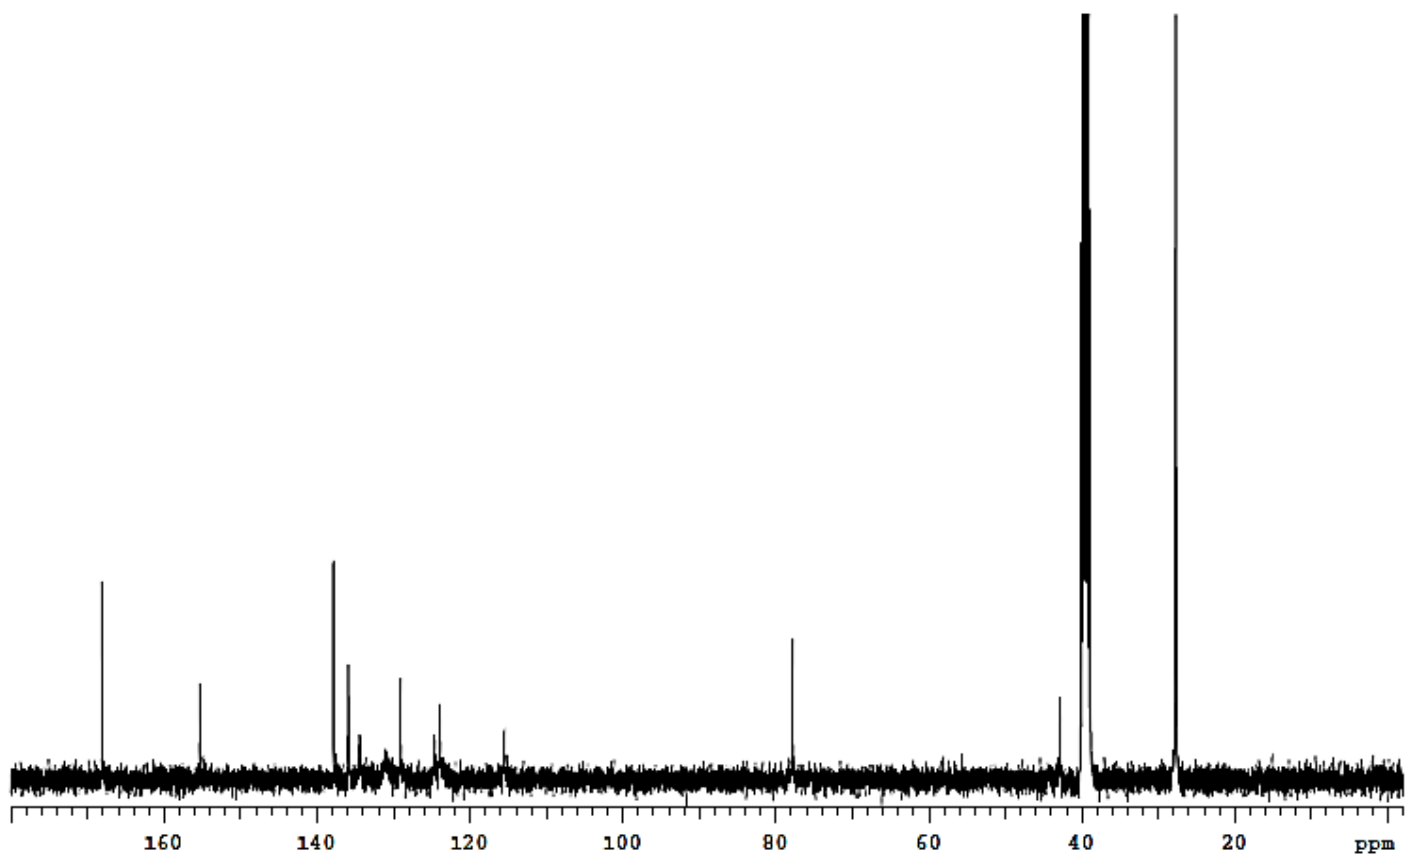

**S-Figure 2:**  $^{13}\text{C}$  NMR of **3** in  $\text{DMSO-d}_6$

**tetra BOC**

L081509 19 (1.962) Cm (18:22)

1: TOF MS ES+  
128

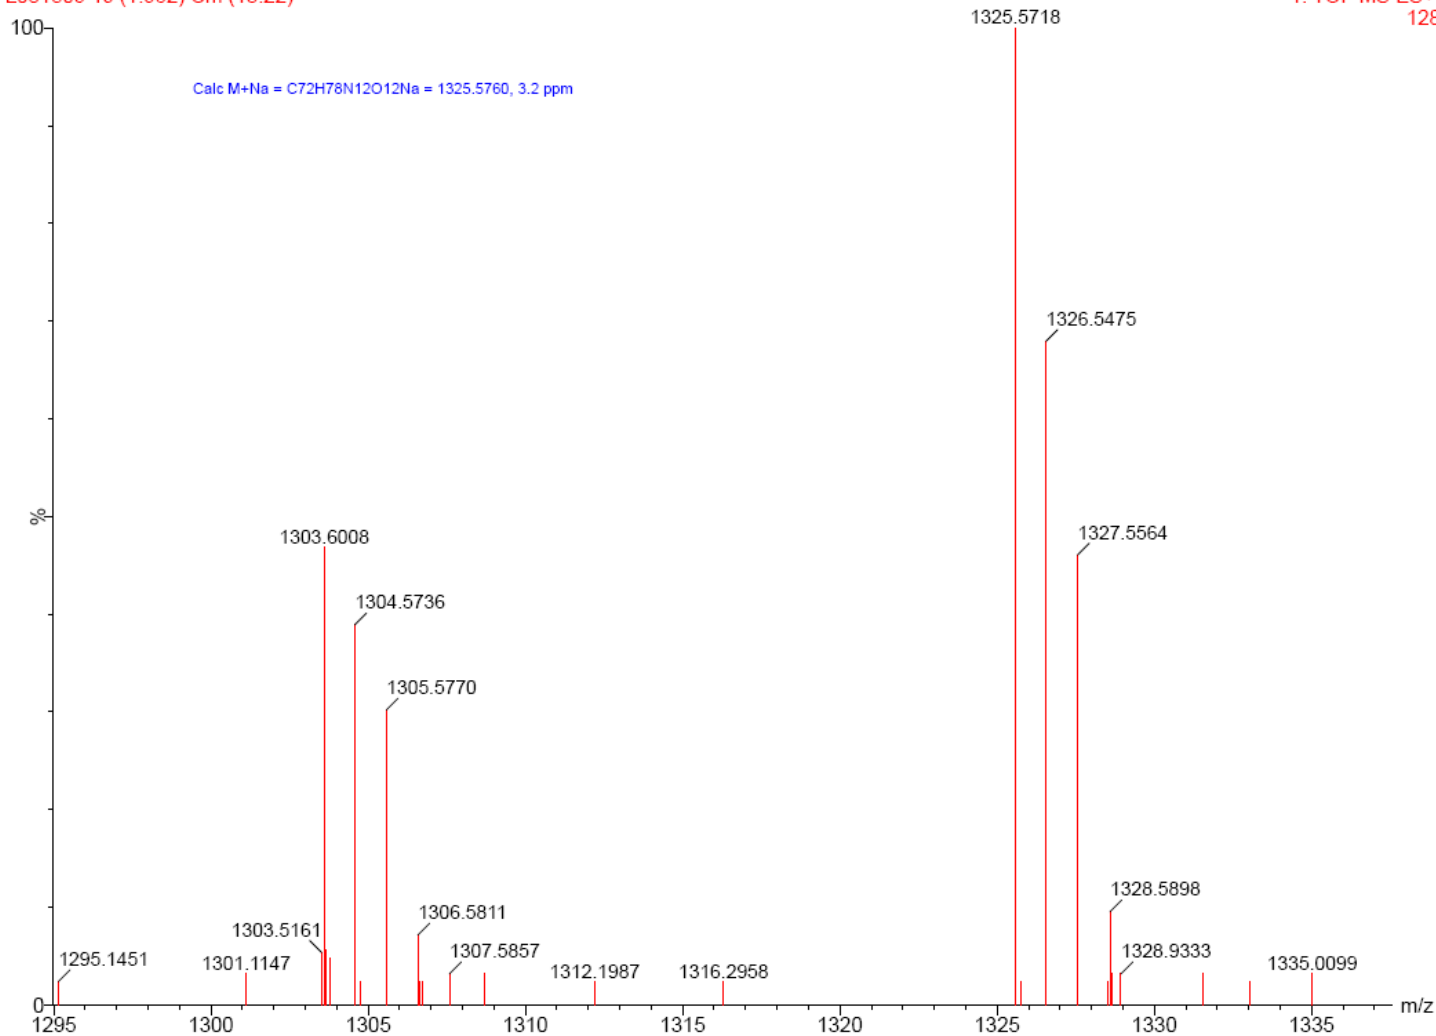

**S-Figure 3: HRMS of 3**

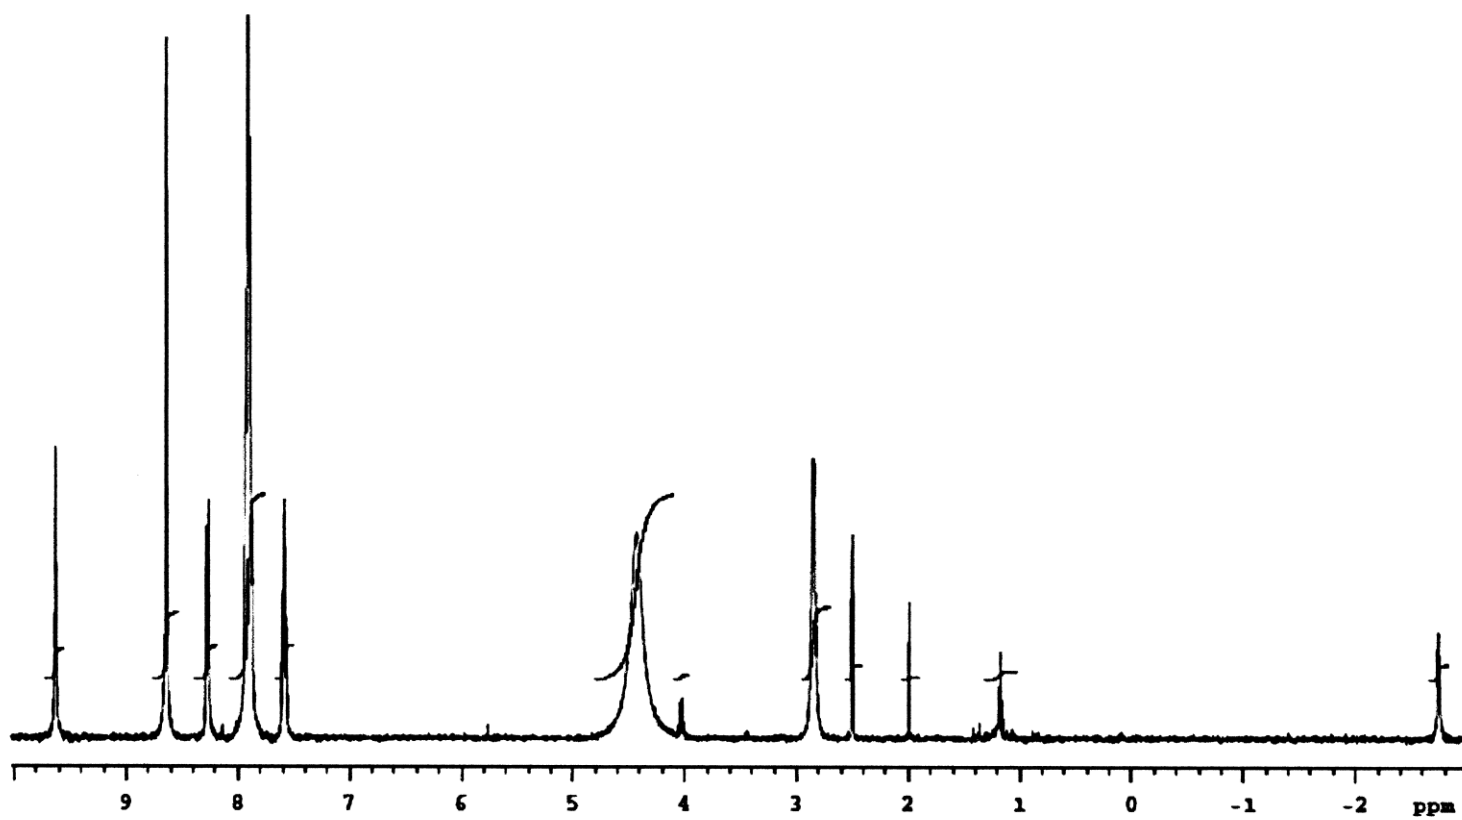

**S-Figure 4:**  $^1\text{H}$  NMR of **4a** in  $\text{DMSO-d}_6$  (resonances at 4.0, 2.0, and 1.15 ppm are ethyl acetate solvent)

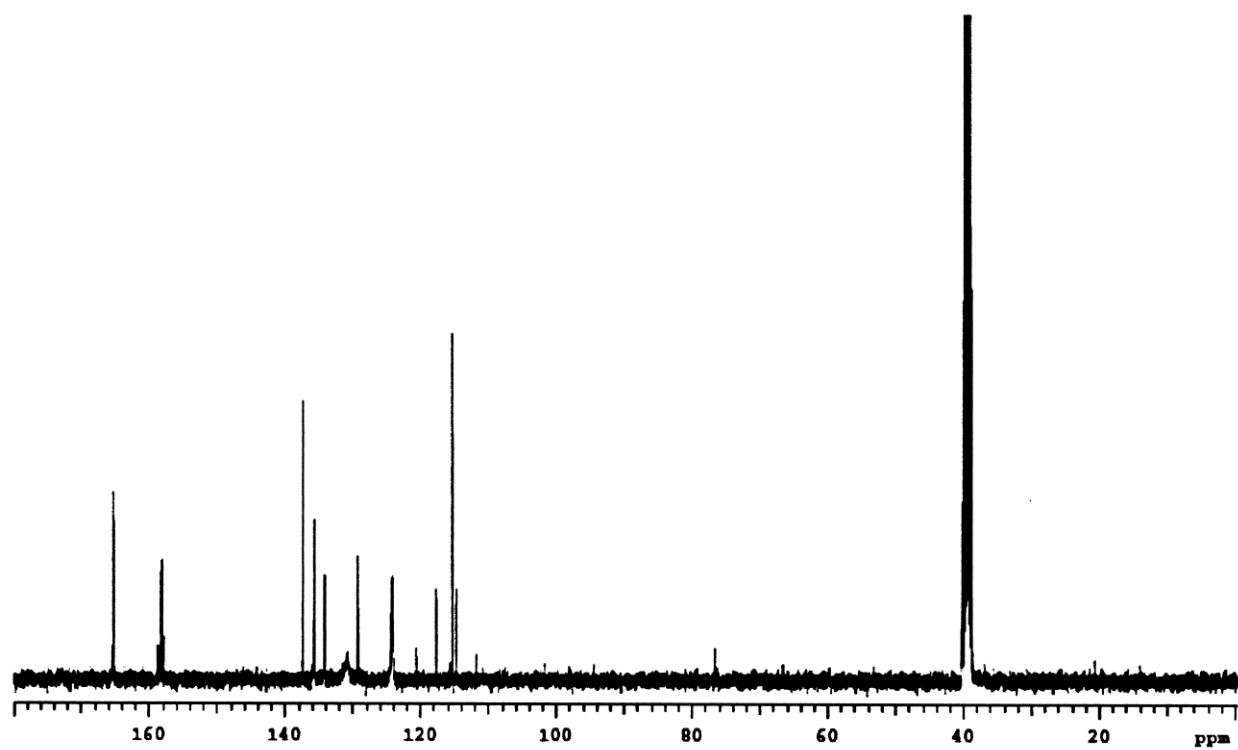

**S-Figure 5:**  $^{13}\text{C}$  NMR of **4a** in  $\text{DMSO-d}_6$

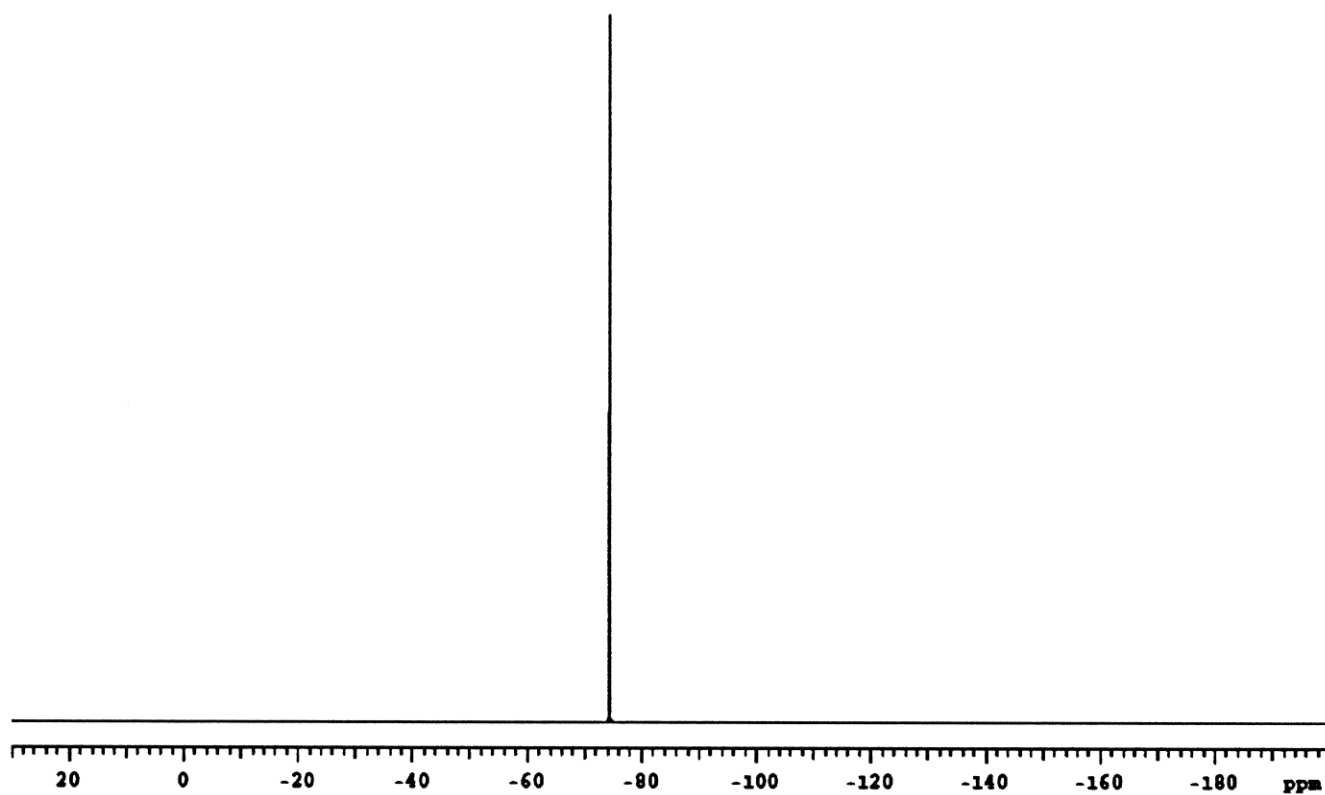

**S-Figure 6:**  $^{19}\text{F}$  NMR of **4a** in DMSO- $d_6$  (reference is TFA in DMSO- $d_6$  at -76.55 ppm).

TFA porphyrin in MeOH  
L060647 10 (0.997) Cm (8:13)

1: TOF MS ES+  
2.74e4

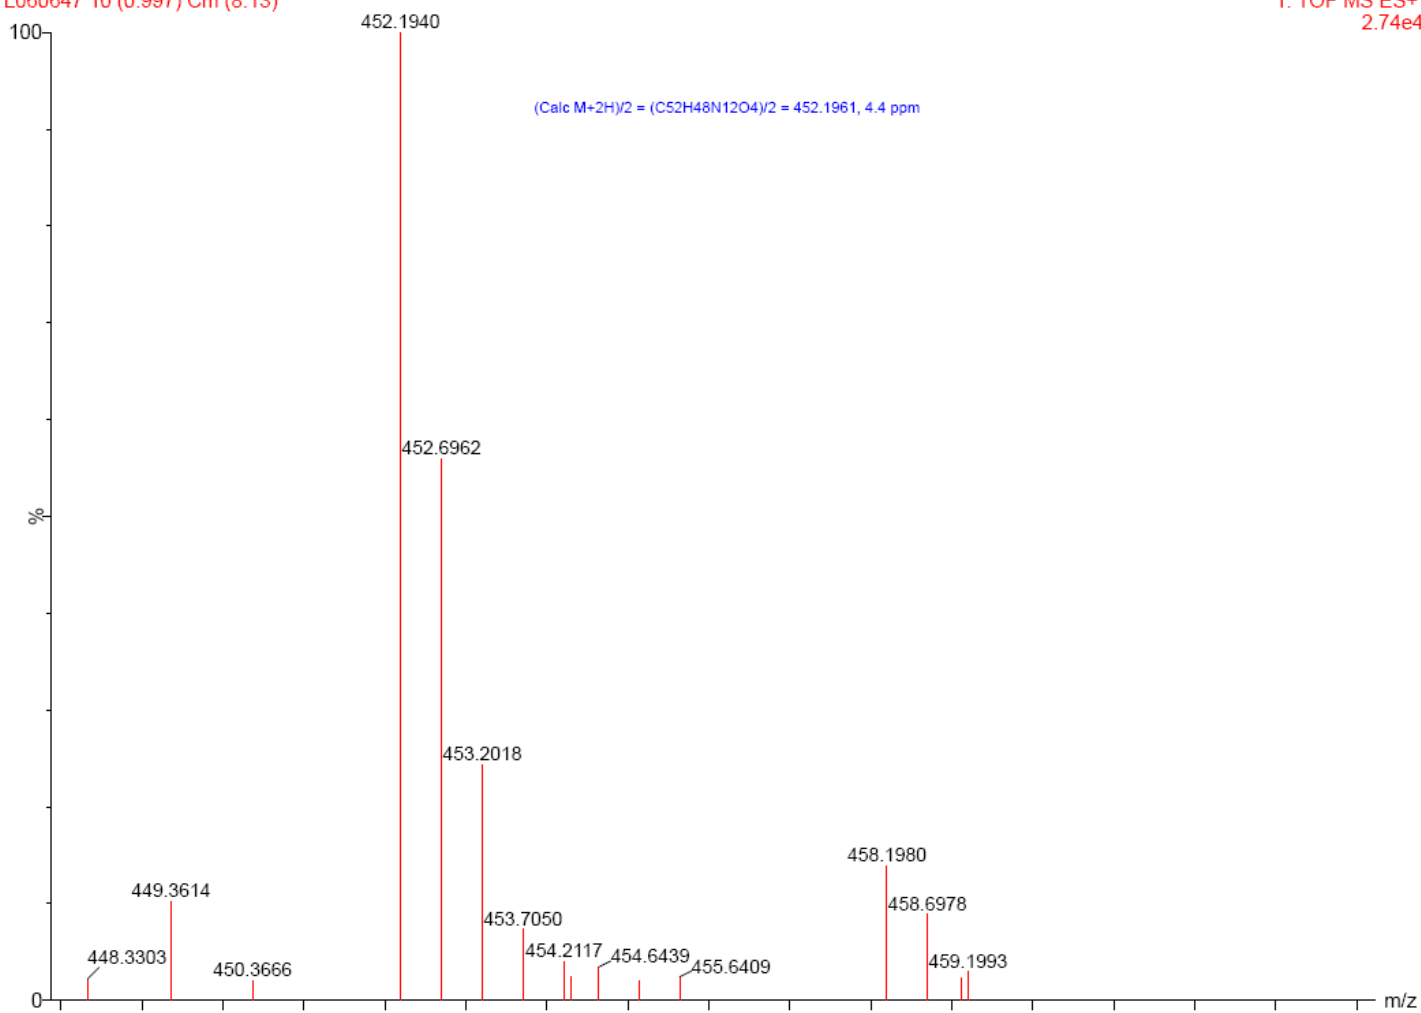

S-Figure 7: ESI HRMS of 4a.



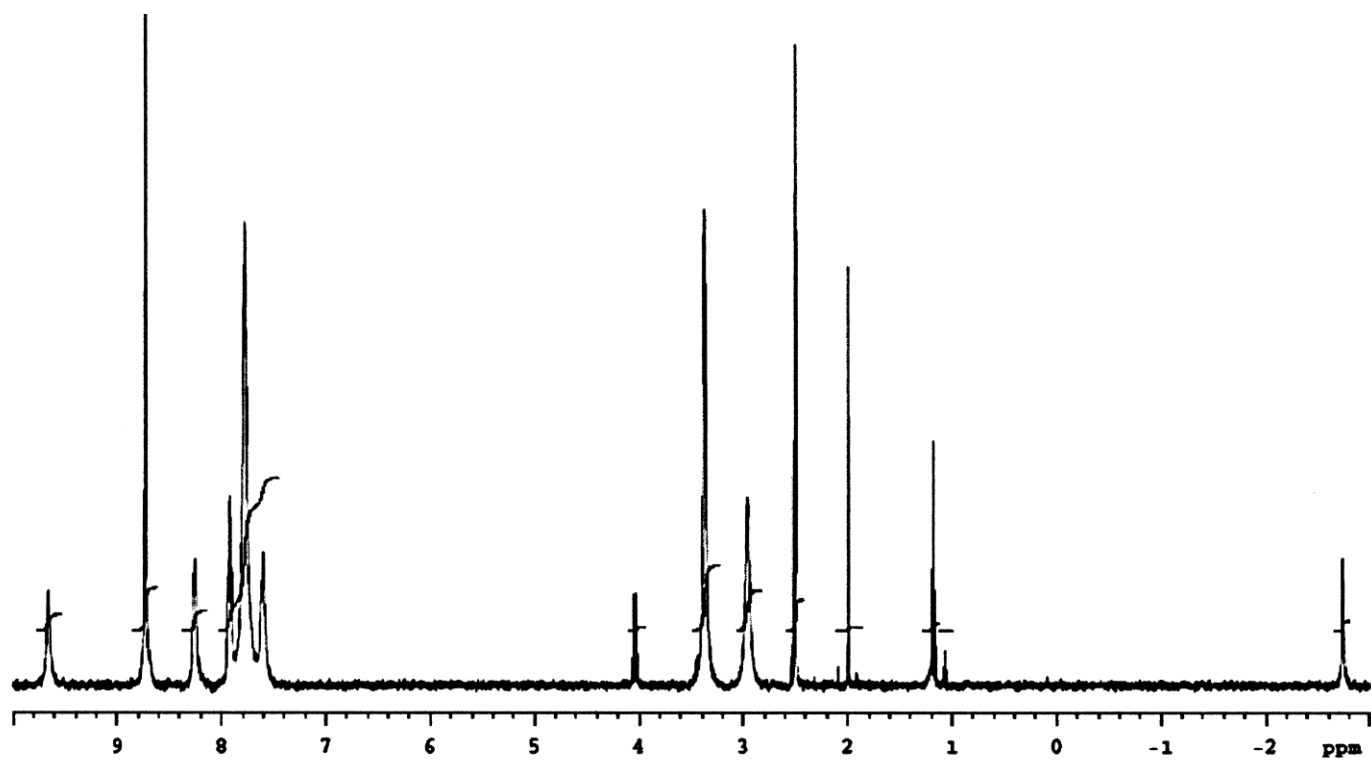

**S-Figure 8:**  $^1\text{H}$  NMR of **4b** in  $\text{DMSO-d}_6$  (resonances at 4.0, 2.0, and 1.15 ppm are ethyl acetate solvent)

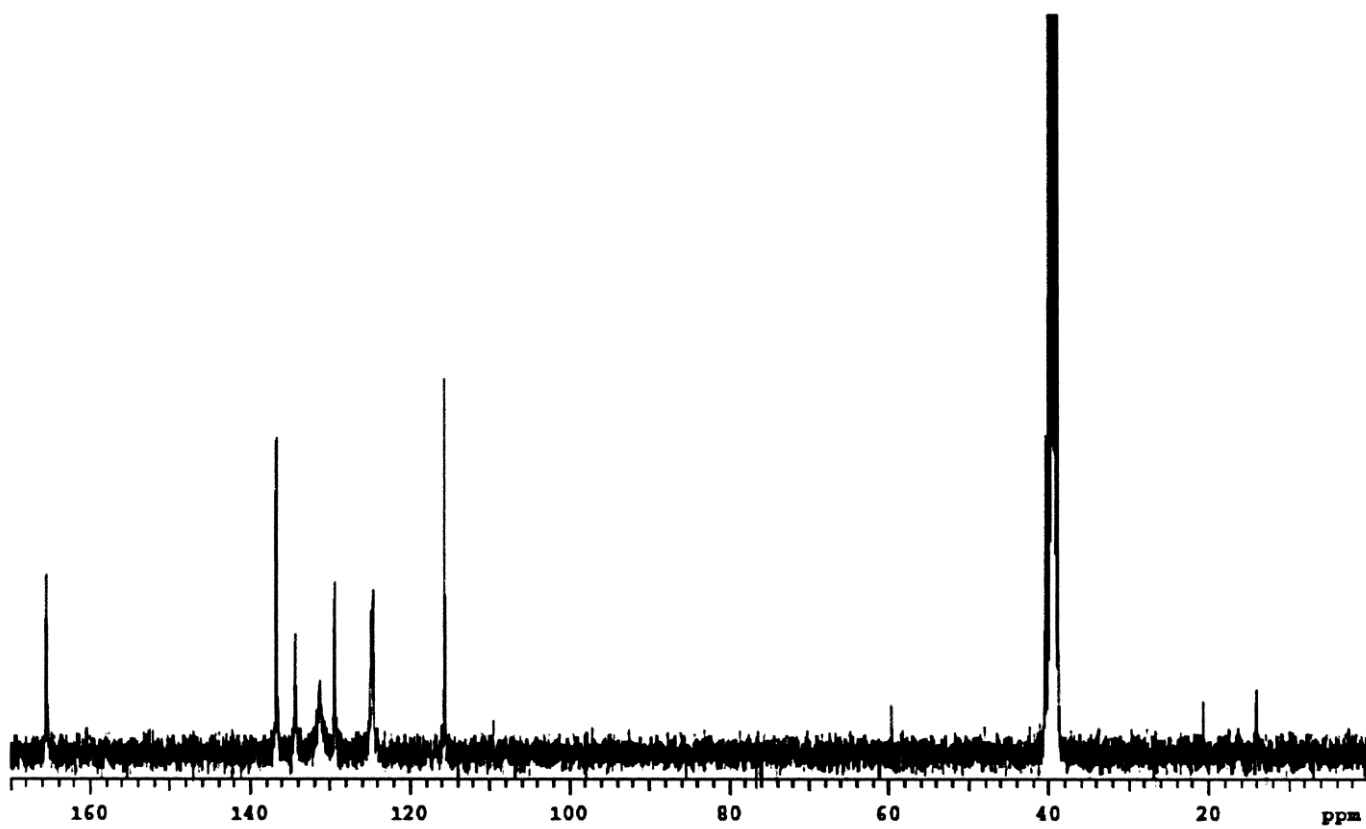

**S-Figure 9:**  $^{13}\text{C}$  NMR of **4b** in  $\text{DMSO-d}_6$

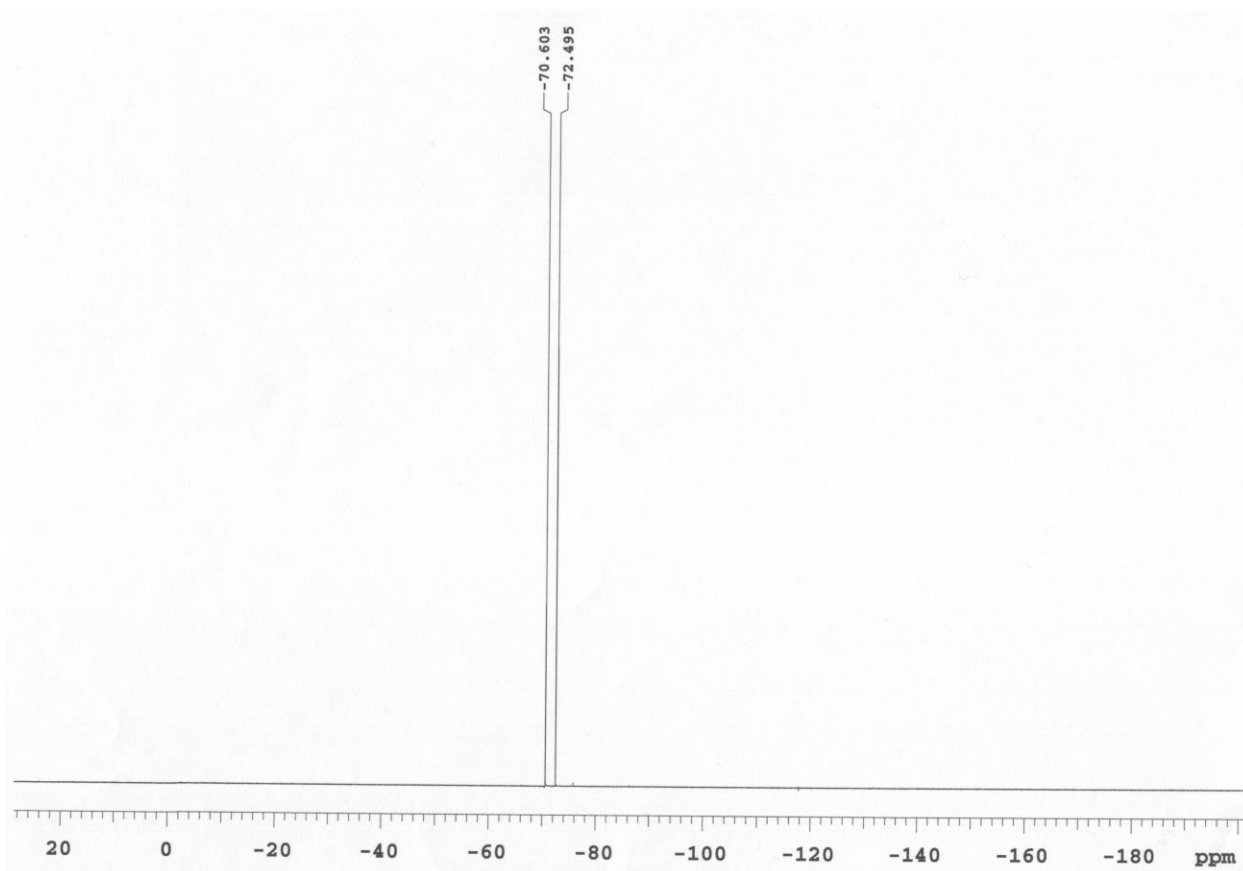

**S-Figure 10:**  $^{19}\text{F}$  NMR of **4b** in DMSO- $\text{d}_6$  (reference is TFA in DMSO- $\text{d}_6$  at -76.55 ppm).

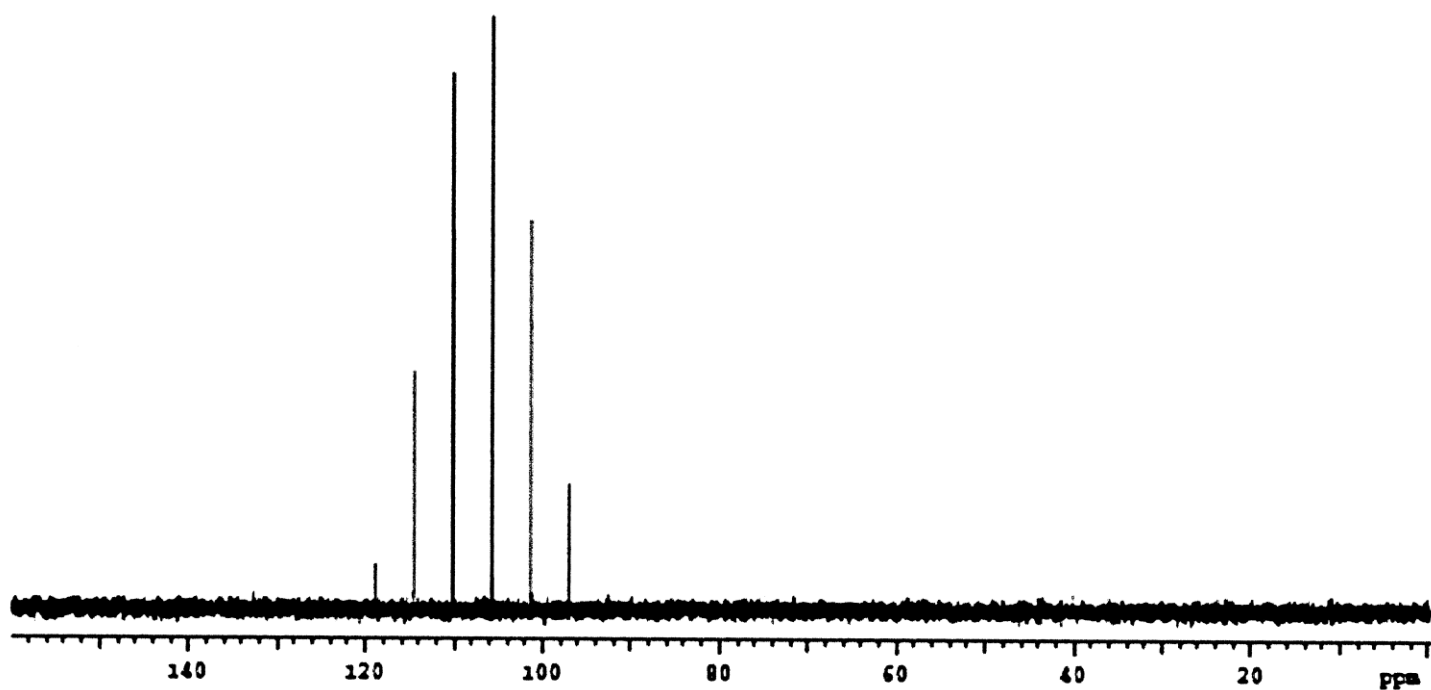

S-Figure 11:  $^{31}\text{P}$  NMR of **4b** in DMSO- $d_6$  (reference is  $\text{H}_2\text{PO}_4$  in DMSO- $d_6$  at 0.00 ppm).

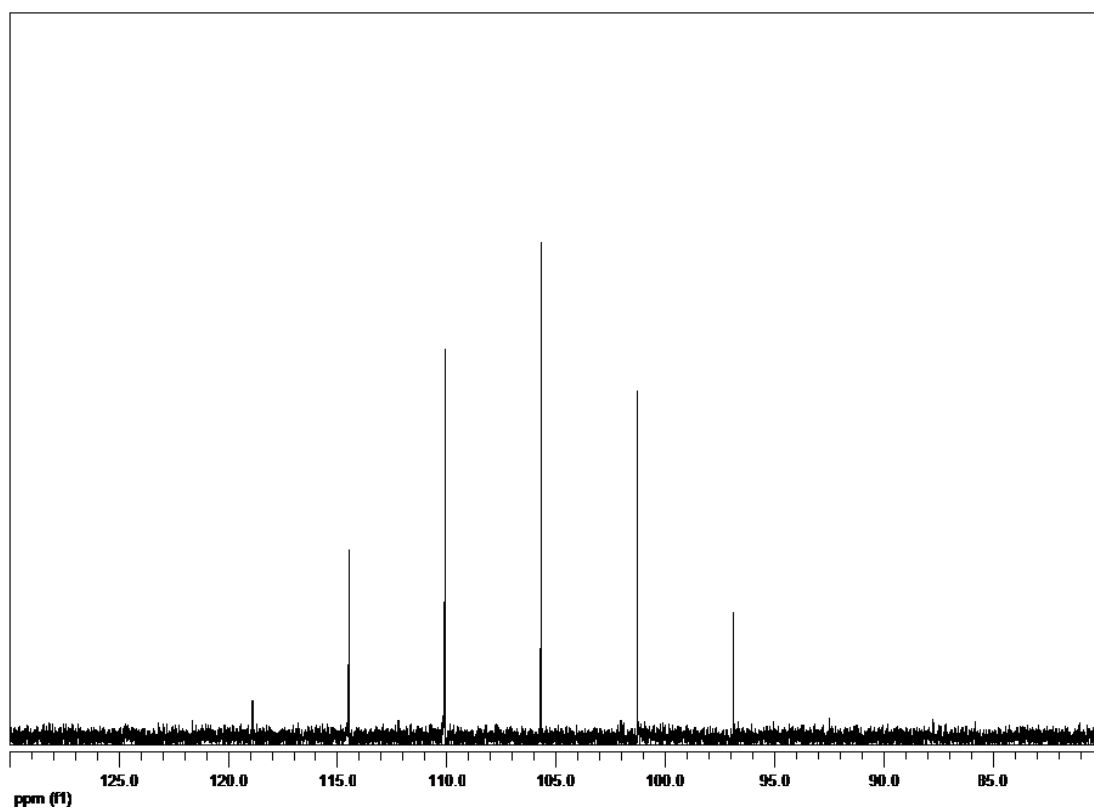

S-Figure 12:  $^{31}\text{P}$  NMR of  $\text{NH}_4\text{PF}_6$  in DMSO- $d_6$  for comparison

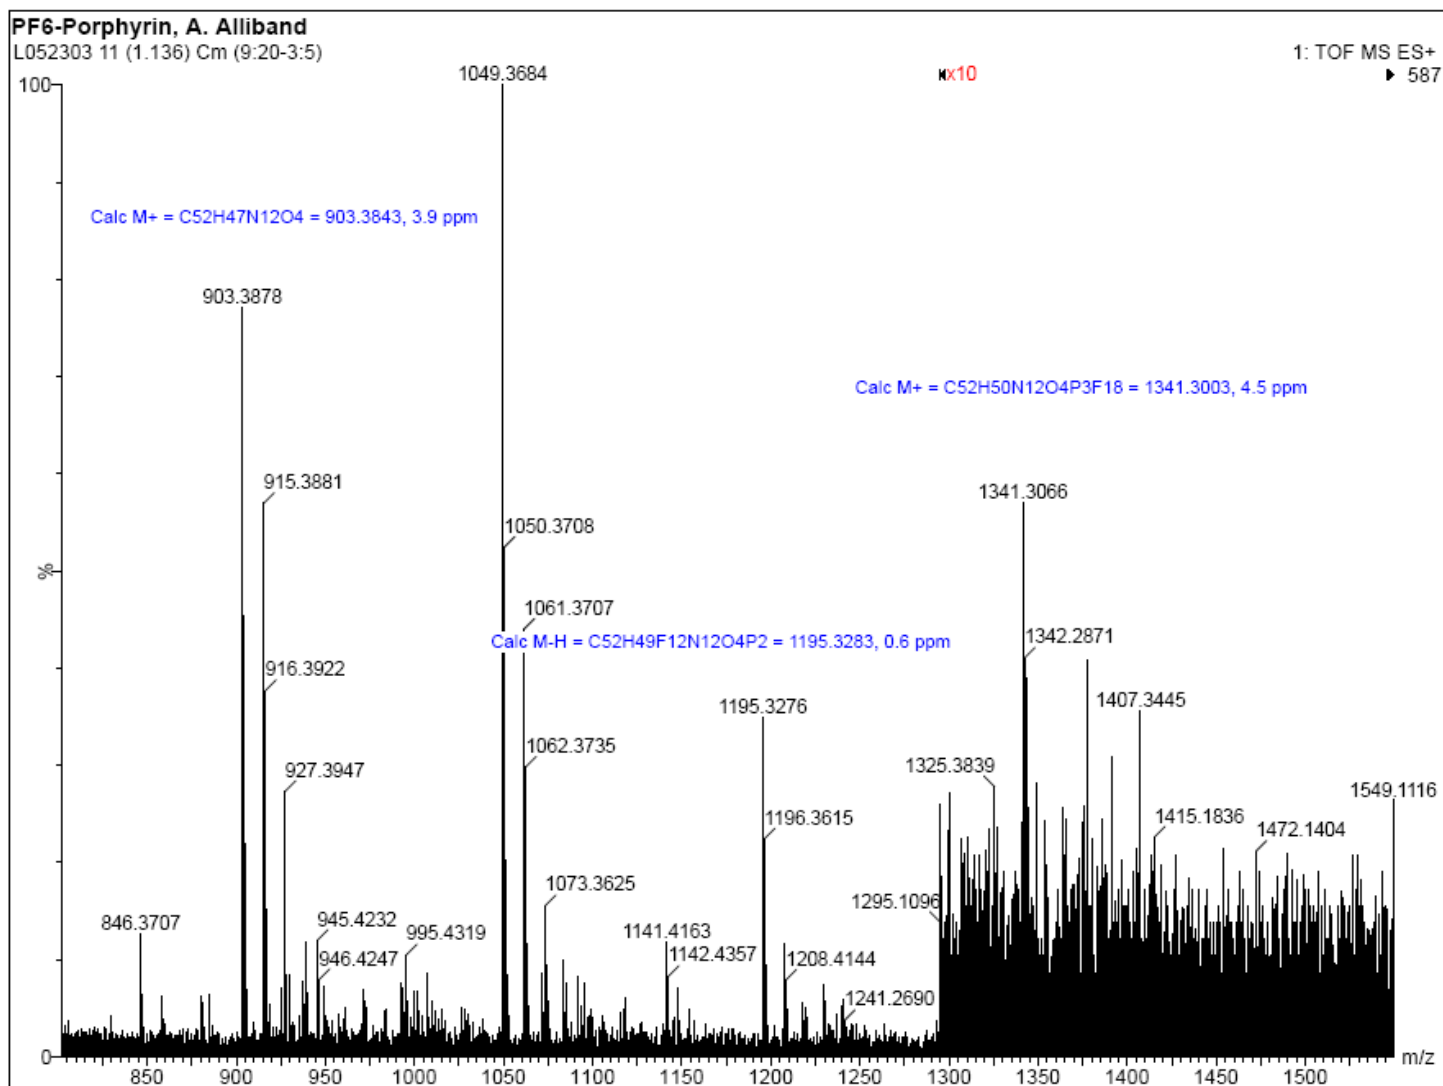

**S-Figure 13: HRMS of 4b**

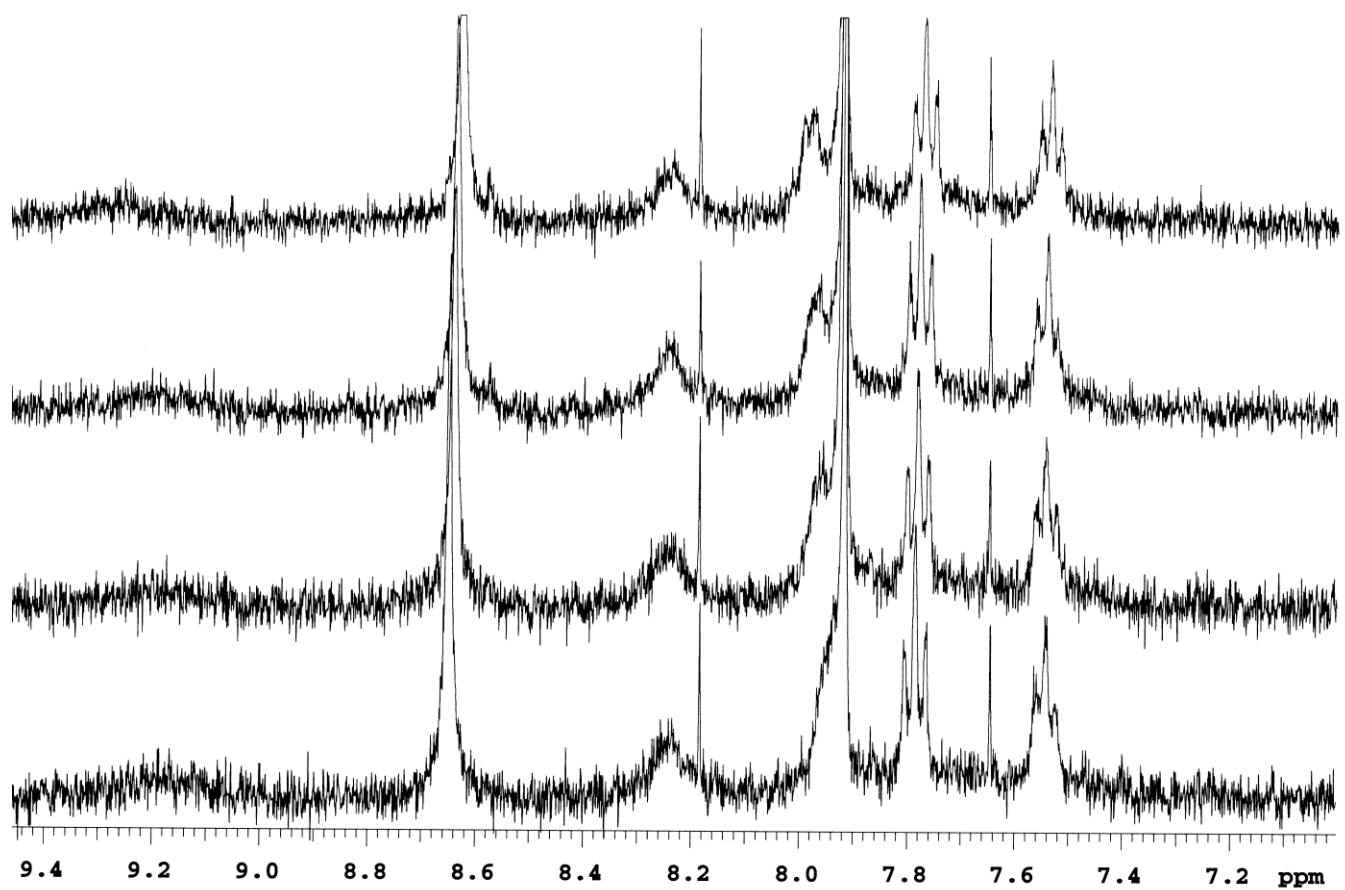

**S-Figure 14.** Stacked plot of partial spectrum from the titration of porphyrin **4b** with TBAPG (60% CDCl<sub>3</sub>/40% DMSO-d<sub>6</sub>). Equivalents of TBAPG (from bottom to top): 0.0; 0.6; 1.0; 2.5. The broad singlet of the amide protons at 9.18 ppm moves downfield with increased TBAPG equivalents; the ammonium protons at 7.92 ppm also move downfield with increased TBAPG equivalents.

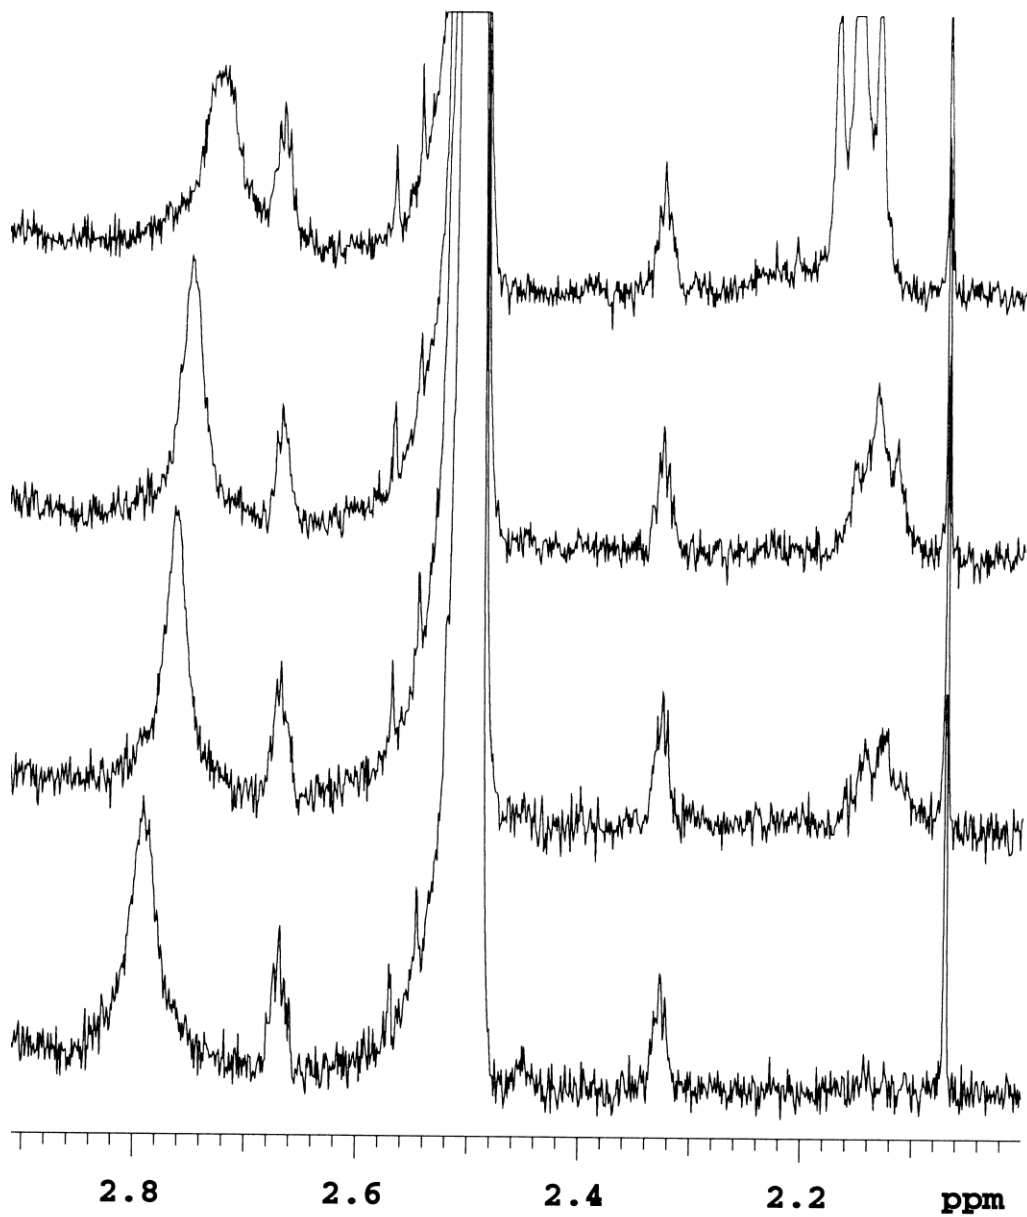

**S-Figure 15.** Stacked plot of partial spectrum from the titration of **4b** with TBAPG (60% CDCl<sub>3</sub>/ 40% DMSO-d<sub>6</sub>). Equivalents of TBAPG (from bottom to top): 0.0; 0.6; 1.0; 2.5. The broad singlet of the glycine methylenes at 2.79 ppm moves upfield with increased TBAPG equivalents.

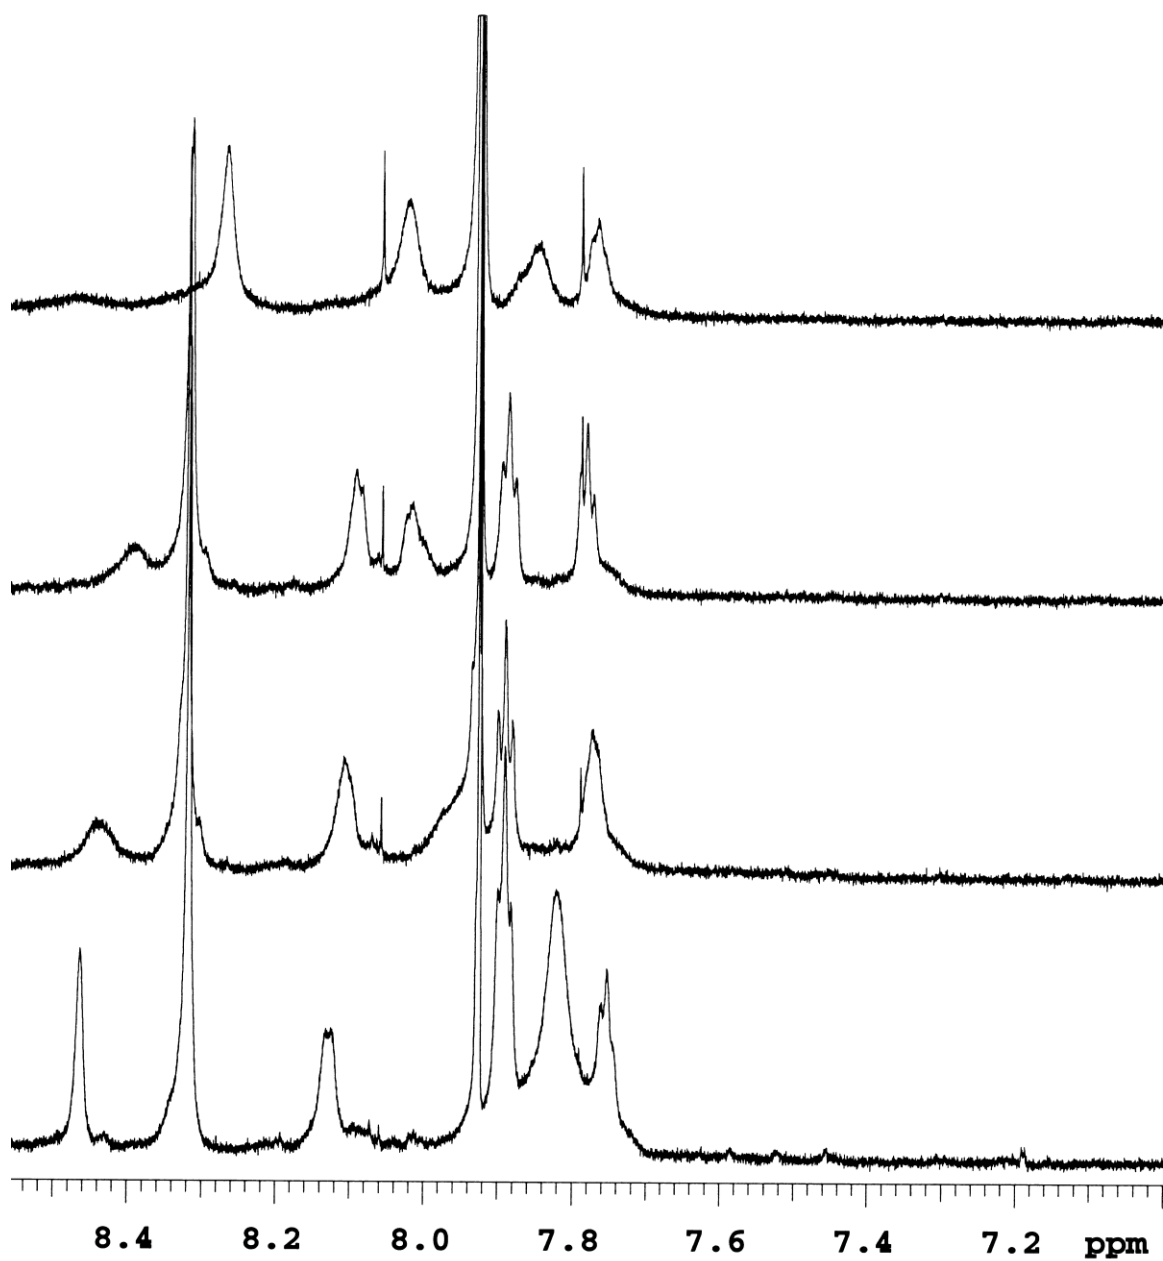

**S-Figure 16.** Stacked plot of partial spectrum of the titration of **4b** with TBAH<sub>2</sub>PO<sub>4</sub> (60% CDCl<sub>3</sub>/ 40% DMSO-d<sub>6</sub>). Equivalents of TBAH<sub>2</sub>PO<sub>4</sub> (from bottom to top) 0.0; 0.6; 1.0; 2.5. Broad singlet of the ammonium protons



at 7.82 ppm move downfield with increased  $\text{TBAH}_2\text{PO}_4$  equivalents. Singlet of the amide protons at 8.46 ppm move upfield with increased  $\text{TBAH}_2\text{PO}_4$  equivalents (up to addition of one equivalent).

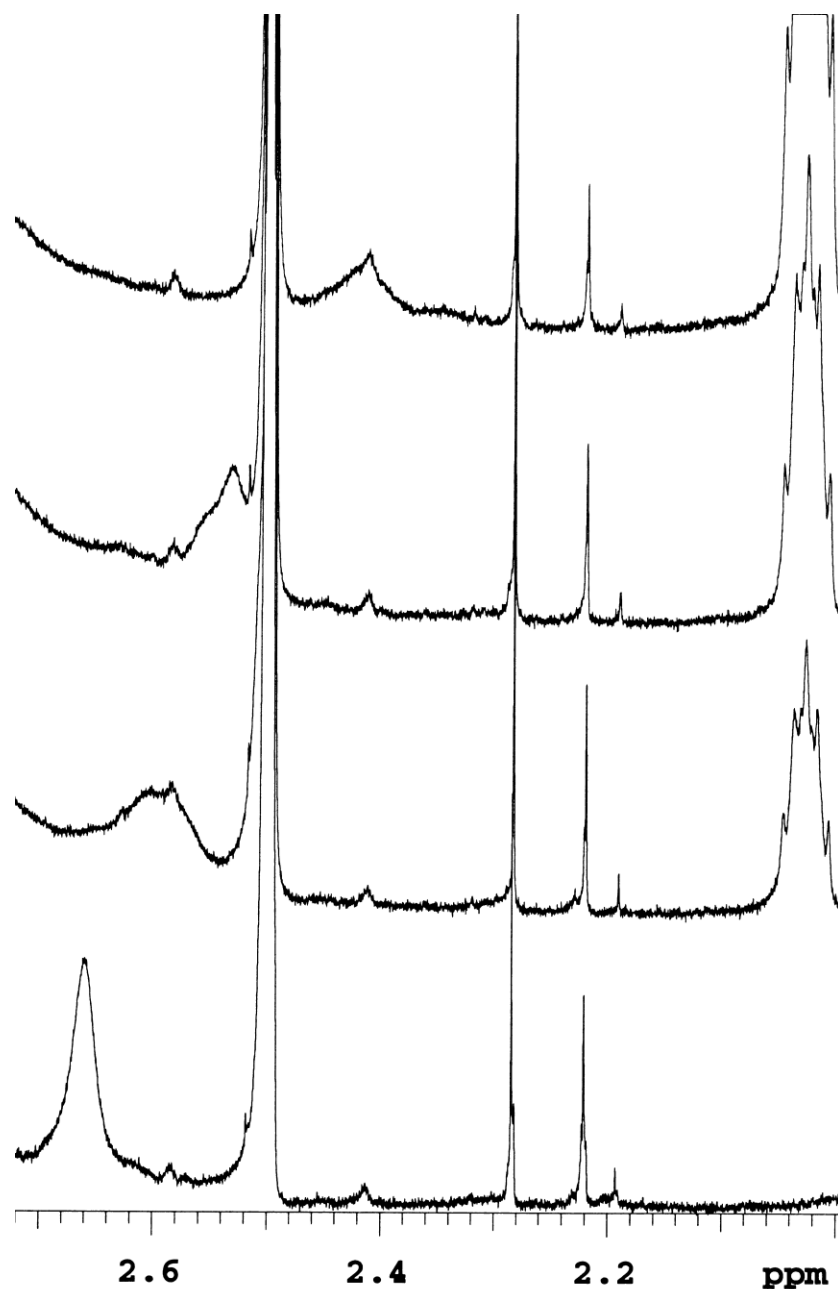

**S-Figure 17.** Stacked plot of partial spectrum of the titration of **4b** with  $\text{TBAH}_2\text{PO}_4$  (60%  $\text{CDCl}_3$ / 40%  $\text{DMSO-d}_6$ ). Equivalents of  $\text{TBAH}_2\text{PO}_4$  (from bottom to top) 0.0; 0.6; 1.0; 2.5. Broad singlet of the glycine methylenes at 2.67 ppm move upfield with increased  $\text{TBAH}_2\text{PO}_4$  equivalents.

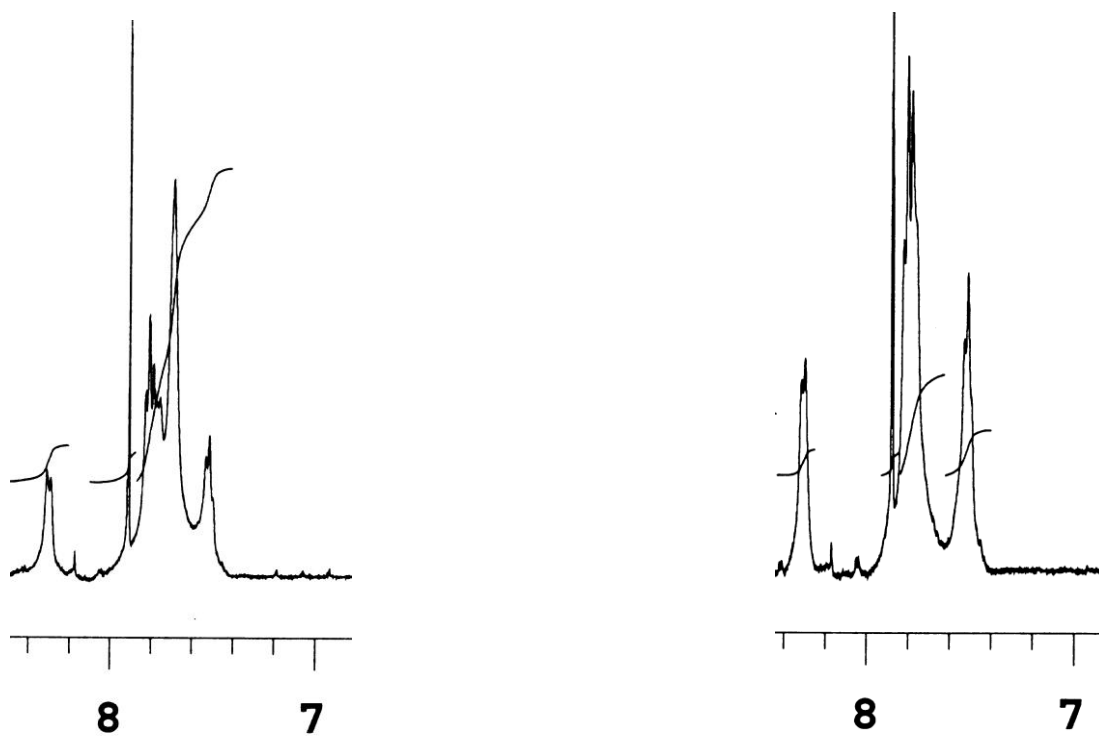

**S-Figure 18.** Partial spectra of **4b** (60% CDCl<sub>3</sub>/ 40% DMSO-d<sub>6</sub>): Left, proton resonance at 7.7 ppm are the 12 ammonium protons; Right, spectrum after addition of CD<sub>3</sub>OD showing deuterium exchange and resultant loss of proton resonance at 7.7 ppm.

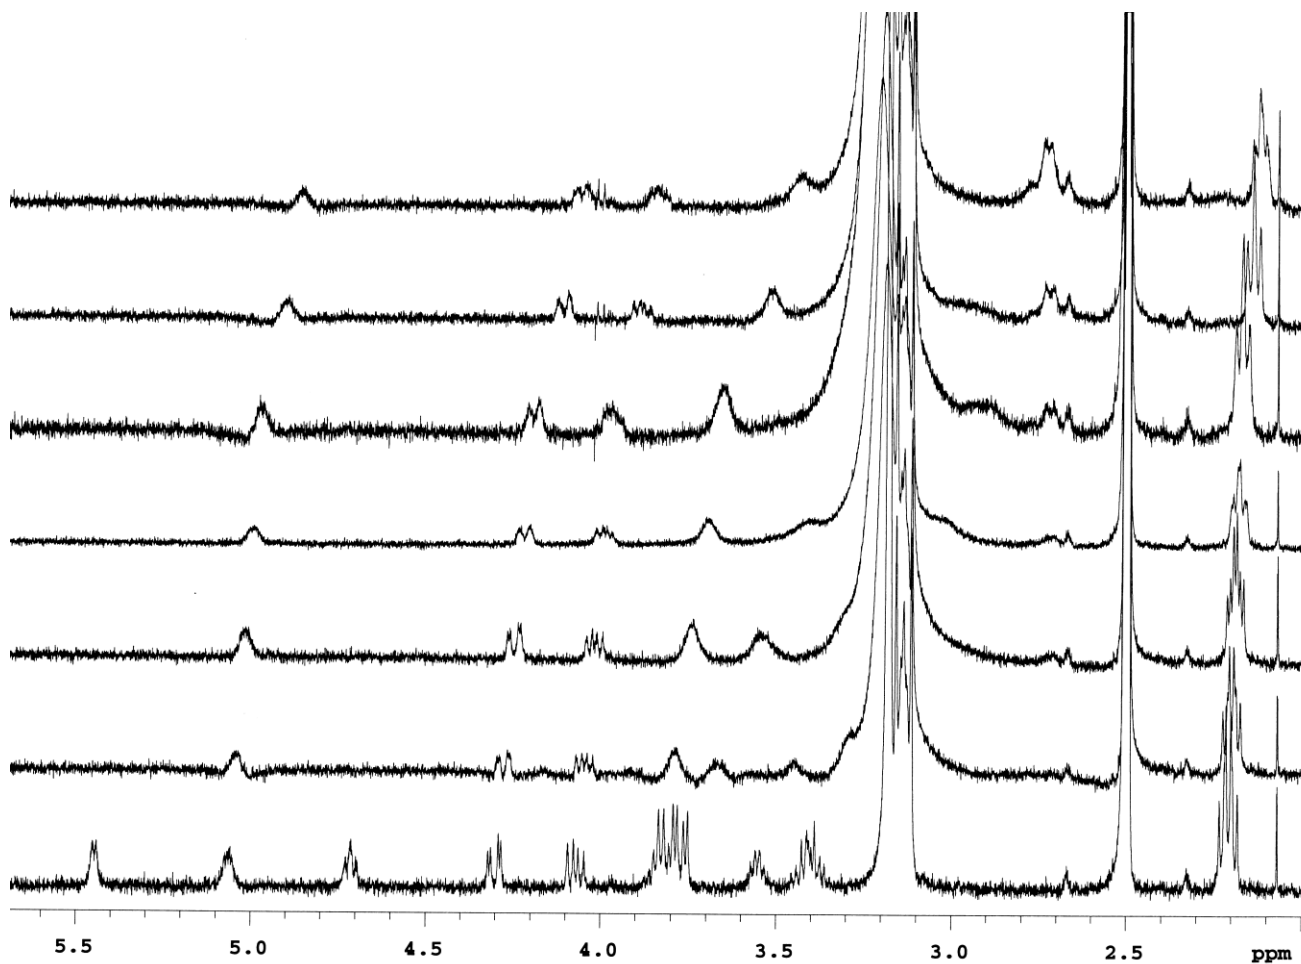

**S-Figure 19.** Stacked plot partial spectra of the inverse titration of TBAPG (60% CDCl<sub>3</sub>/40% DMSO-d<sub>6</sub>) with **4b**. Equivalents of **4b** are (from bottom to top): 0.0; 0.05; 0.10; 0.15; 0.20; 0.4; 0.6. Multiplets in the region between 3.35-3.85 ppm that correspond to the lipid's glycerol headgroup protons move quickly upfield with increasing equivalents of **4b**.

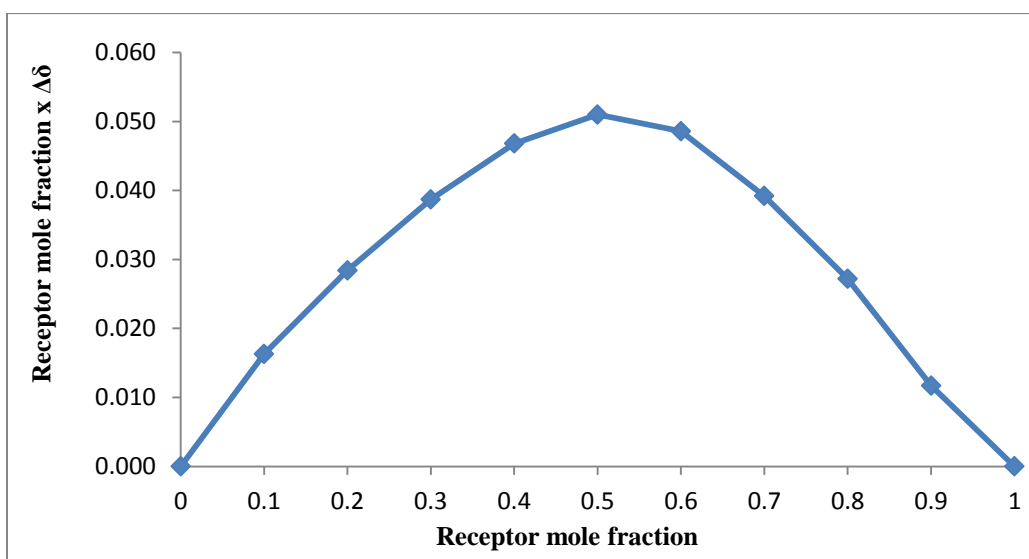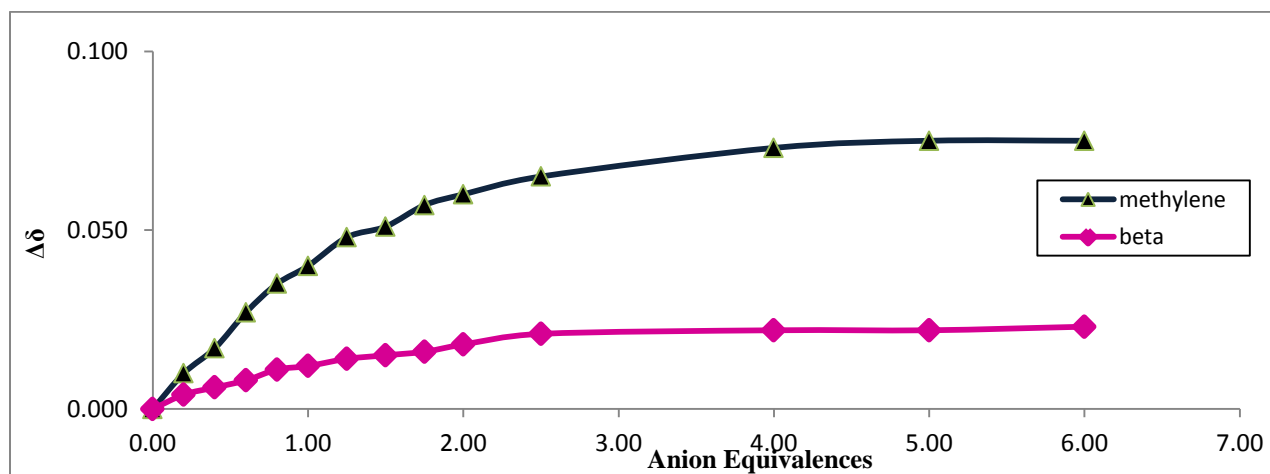

**S-Figure 20:** Representative example of  $^1\text{H}$  NMR titration experiments in 40% DMSO/ 60%  $\text{CHCl}_3$  at 30  $^\circ\text{C}$ .

Upper: Job plot for TBAPG and **4b** (**4b** mole fraction plotted on x-axis); Bottom: Binding isotherms for the titration of **4b** with TBAPG. The JOB experiments and titration experiments were conducted at slightly different concentrations to remove any artifacts caused by different concentrations when using  $^1\text{H}$  NMR.

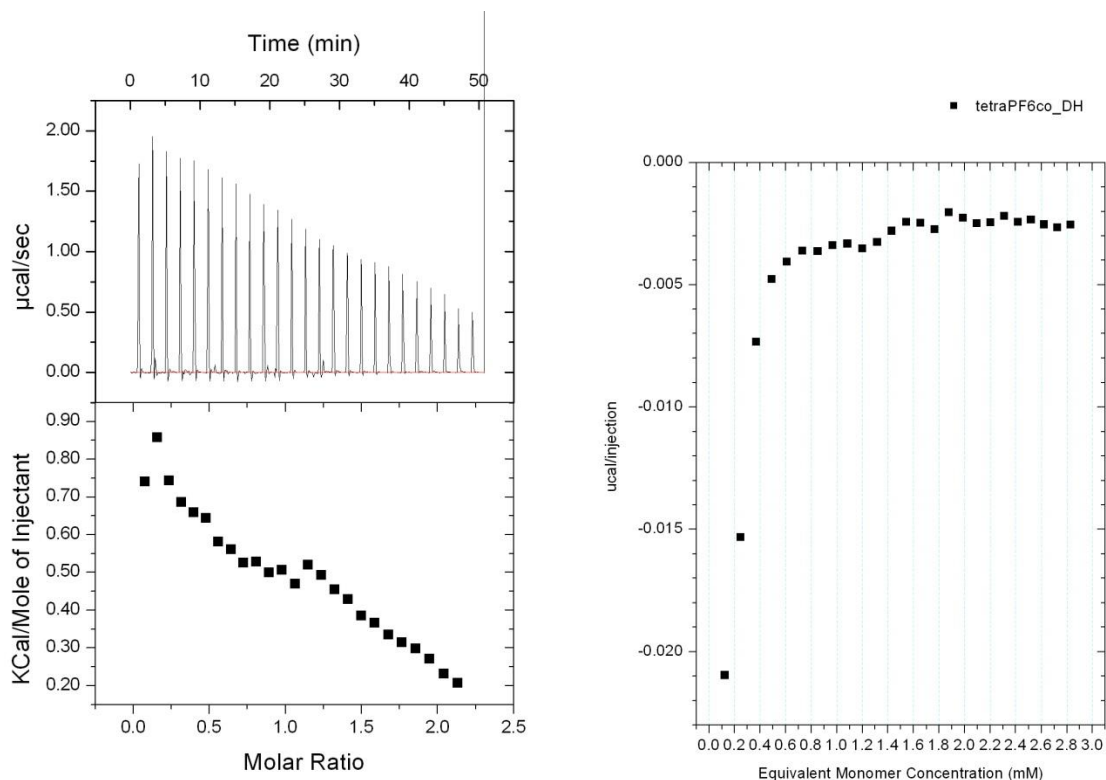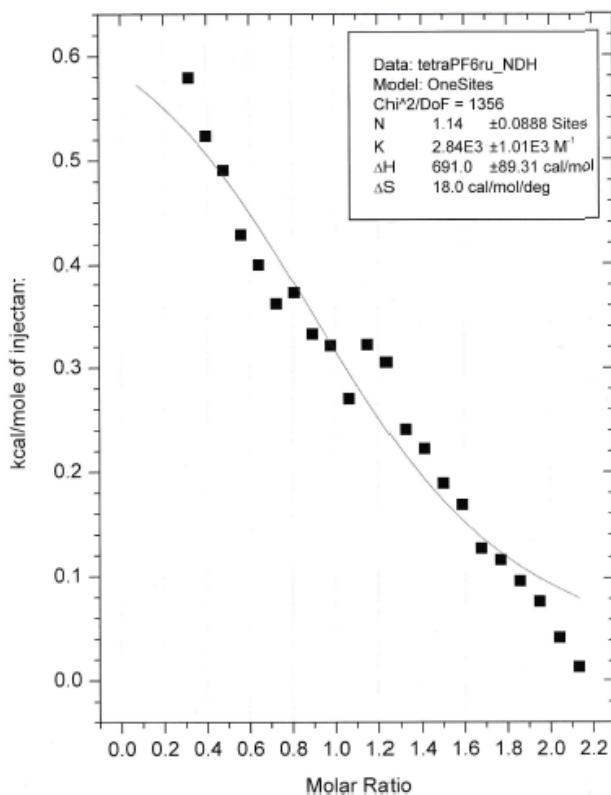

**S-Figure 21:** Representative example of ITC experiment in 50% DMSO/ 45% CHCl<sub>3</sub>/ 5% CH<sub>3</sub>OH at 40 °C. Upper left: ITC data for the TBAPG addition to **4b**; Upper right: ITC data for the control addition of TBAPG to solvent system; Bottom: Corrected ITC curve for the addition of TBAPG to **4b** after subtraction of control curve.

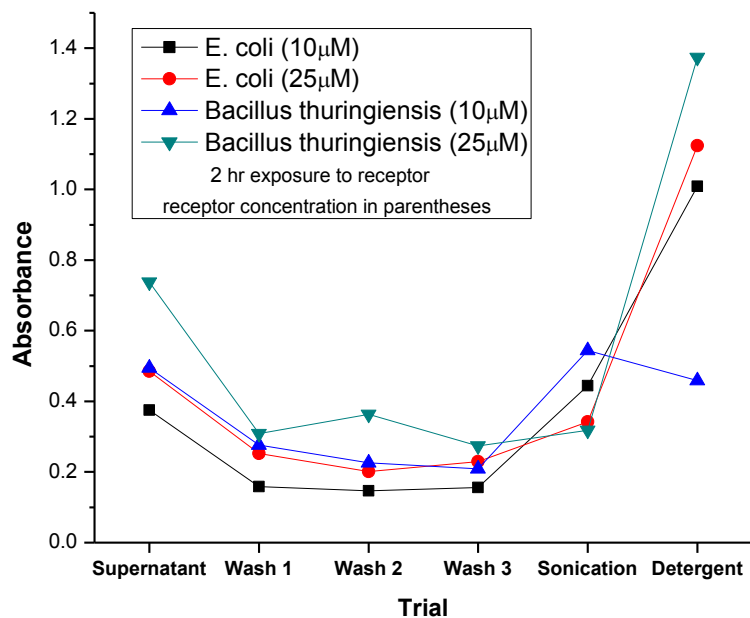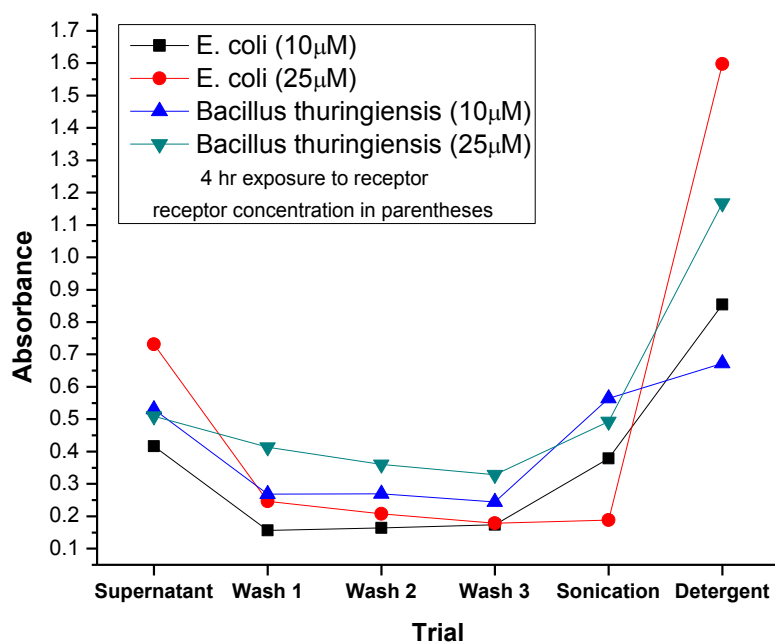

**S-Figure 22:** Absorbance (420 nm) of supernatants of various trials with *E. coli* and *Bacillus thuringiensis* after incubation of the receptor **4a** (10 or 25 μM) with the bacterial solutions for: Top 2 hr; Bottom 4 hr.

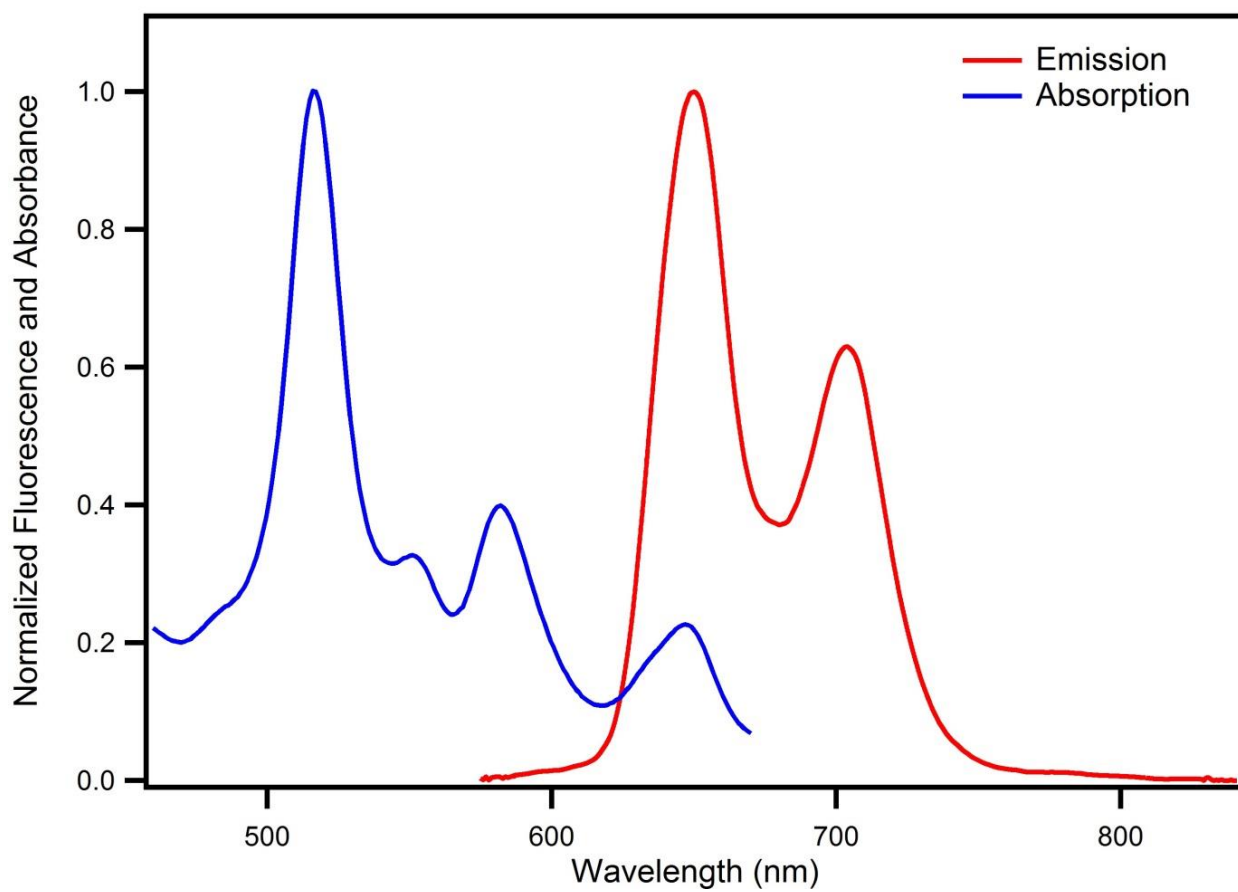

**S-Figure 23:** Normalized absorption spectrum and emission spectrum (excited at 514 nm) of receptor **4a** in HEPES buffer solution (25 mM) containing Na<sub>2</sub>SO<sub>4</sub> (50 mM) at pH 6.5.
